# Supplementary material for: Regulatory networks driving expression of genes critical for glioblastoma are controlled by the transcription factor c-Jun and the pre-existing epigenetic modifications
Source: PubMed Central journal article supplement (PMC9972689; doi:10.1186/s13148-023-01446-4), 2023-02-27
Supplement: 13148_2023_1446_MOESM2_ESM.pdf [file 13148_2023_1446_MOESM2_ESM.pdf]

## Experimental workflow

- Established glioblastoma cell lines (LN18, LN229) and GBM tumors (GBM1 and GBM2)

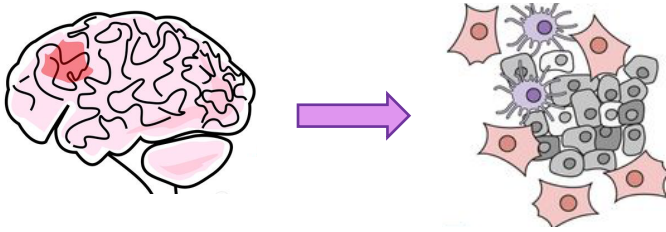

- Assay for Transposase-Accessible Chromatin (ATAC-seq)

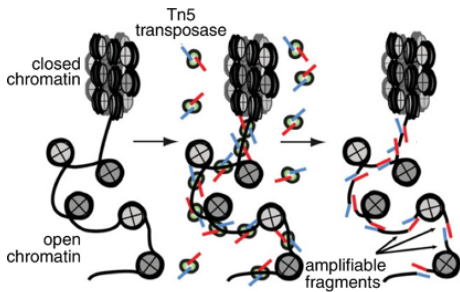

- Cell line gene expression analysis (KAPA stranded mRNA-seq)

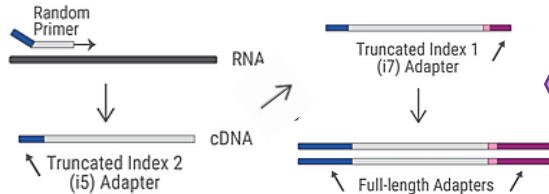

- Tumor DNA methylation profiling (SeqCap Epi CpGiant methylation panel, Roche Sequencing Solutions, Inc.)

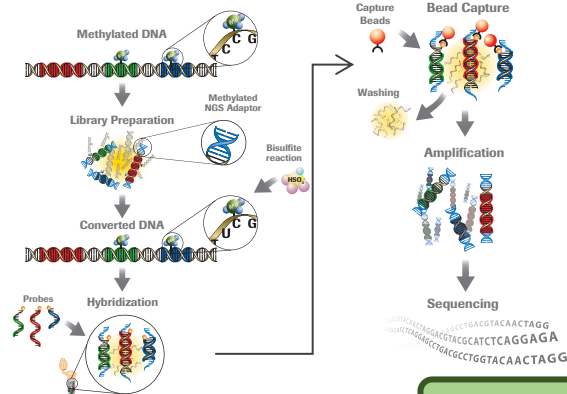

## Bioinformatic analyses

- GIV/GII transcriptomic analysis and selection of significantly overexpressed genes

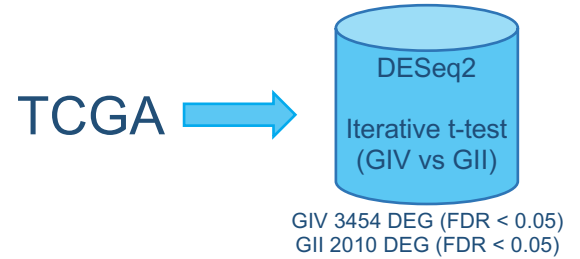

- TF binding prediction from ATAC-seq data in promoter regions and glioma enhancers

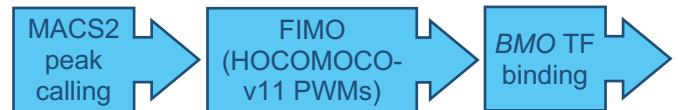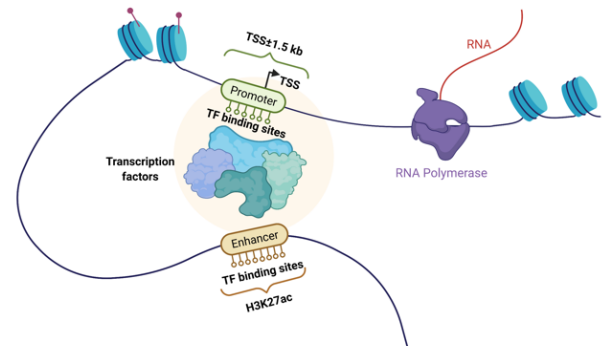

- Identification of TFBS in cis-regulatory regions of overexpressed genes in GII and GIV patients

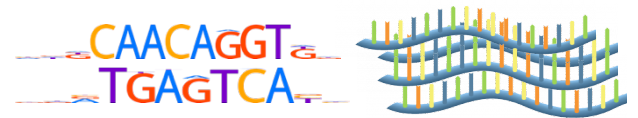

- DNAm (TCGA) and SeqCap Epi CpGiant methylation panel analyses on TFBS and flanking regions of selected overexpressed GIV genes

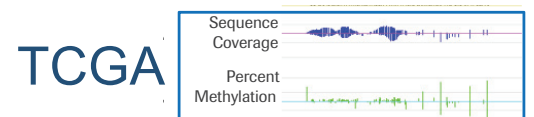

## Experimental validation

**Figure S1.** Study's experimental and bioinformatic effort depicted in a schematic diagram.

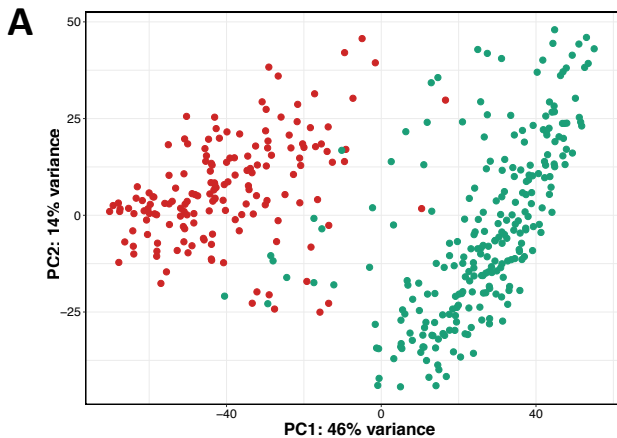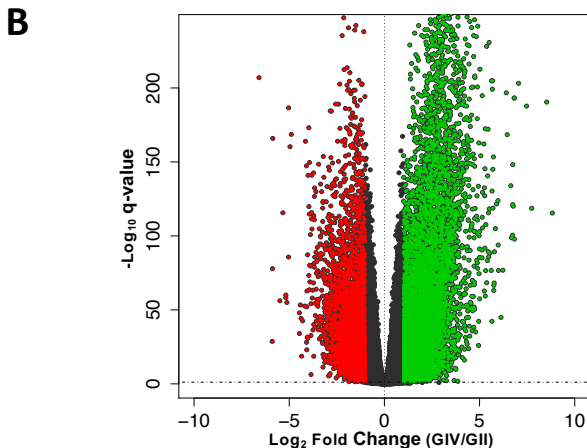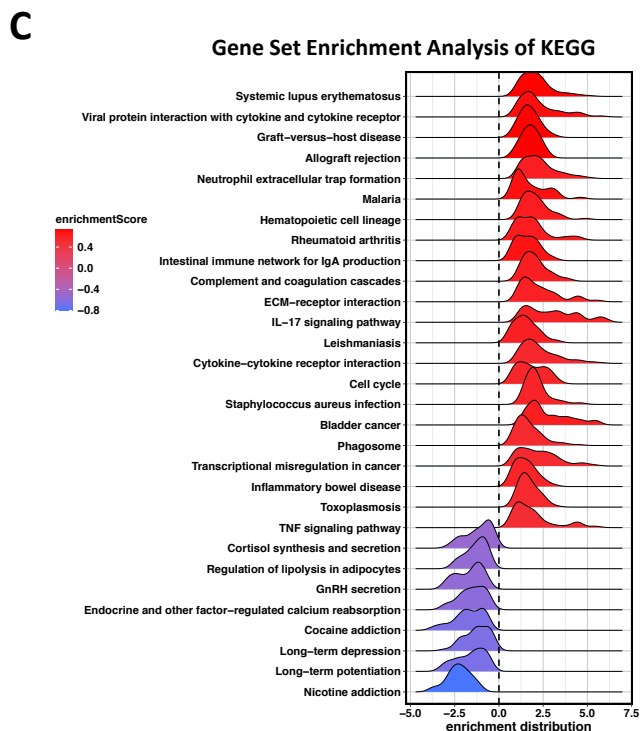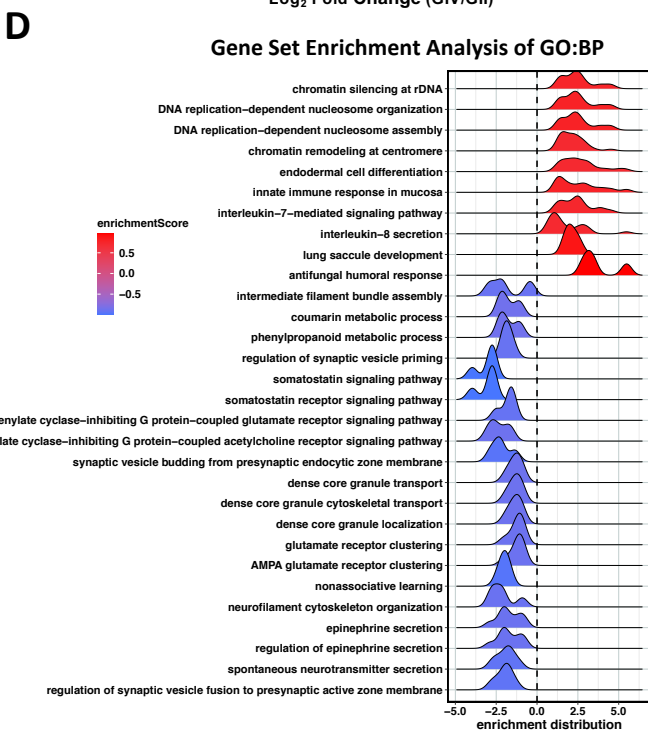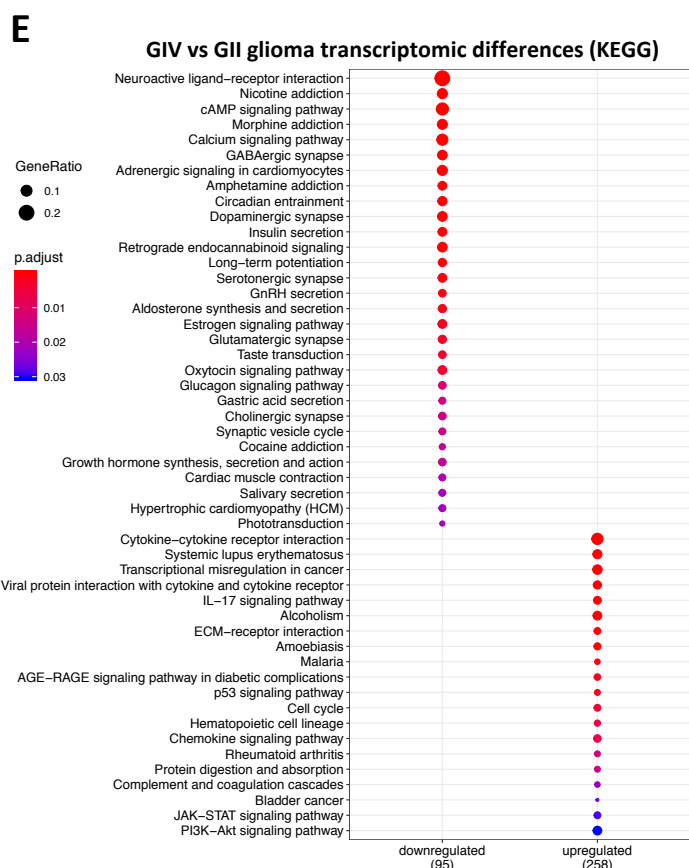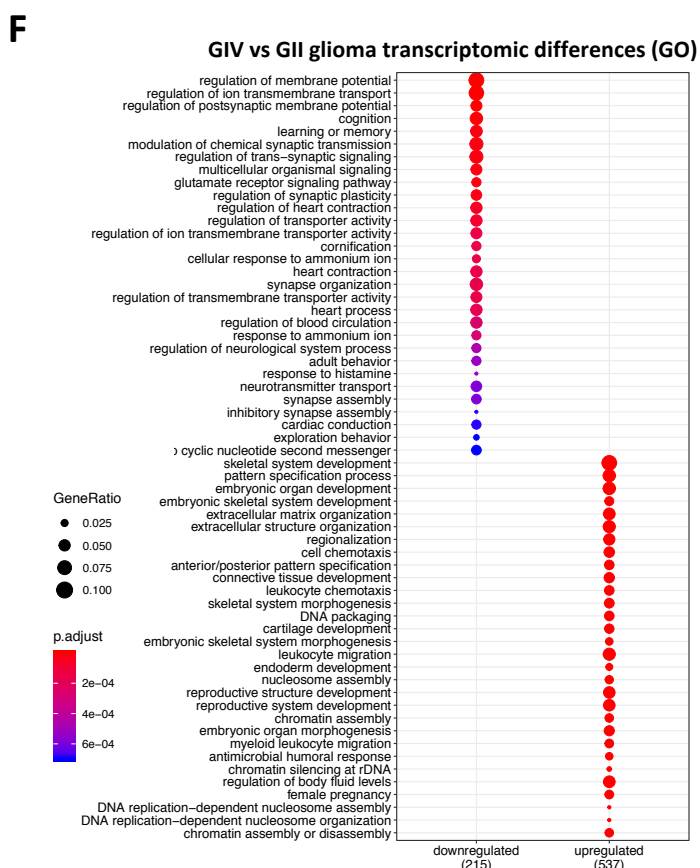

**Figure S2.** Transcriptomic analysis of high- and low-grade gliomas from the TCGA data (248 GII gliomas and 160 GIV gliomas). **(A)** Principal component analysis (PCA) was used to plot TCGA samples. The first two principal components (PCs) are plotted and colored according to the patient's glioma grade. The TCGA's normalized RNA-seq expression data were used to perform PCA. The axis label displays the percentage of variation accounted for by each principal component. **(B)** Volcano plot depicting the relevant gene expression differences between glioma grades (GIV vs GII). Green and red dots represent statistically significant up-regulated genes (DESeq2 methods,  $p_{adj} < 0.05$ ) in GIV gliomas or GII gliomas with  $\log_{2}FC > 1$ . The q-value threshold is indicated by a dotted horizontal line. **(C, D)** Gene set enrichment analysis (GSEA) of highly expressed genes in GIV glioma (red, 10% quantile categories) versus GII glioma (blue, 90% quantile categories) using the **(C)** KEGG and **(D)** Gene Ontology: Biological Processes databases. **(E, F)** Pathway enrichment analysis of differentially expressed genes (up  $\log_{2}FC > 2.5$  and  $p_{adj} < 0.01$ ; down  $\log_{2}FC < -2.5$  and  $p_{adj} < 0.01$ ) reveals regulatory pathways in GIV glioma versus GII glioma. Raw counts were pre-filtered ( $> 5$  reads within the cohort), and the Benjamini–Hochberg (BH) procedure was used to correct for multiple testing.



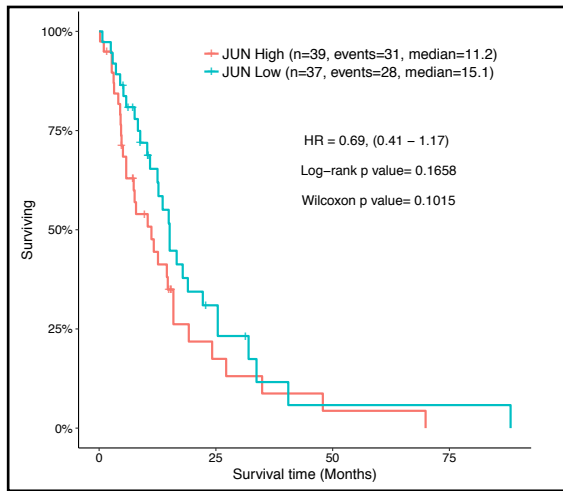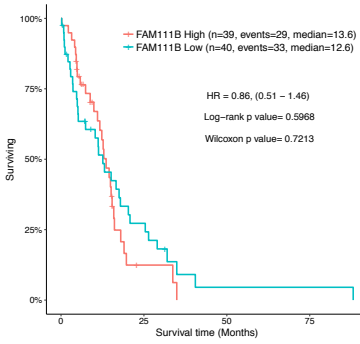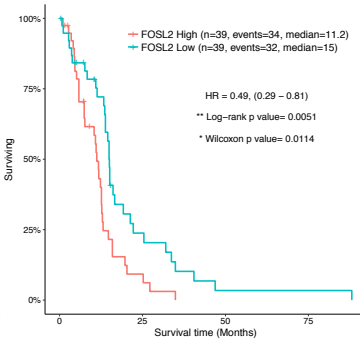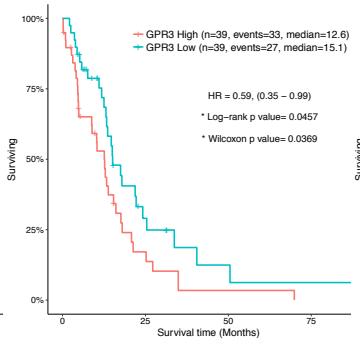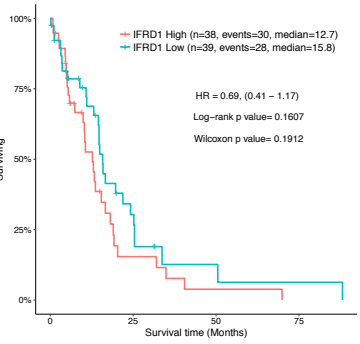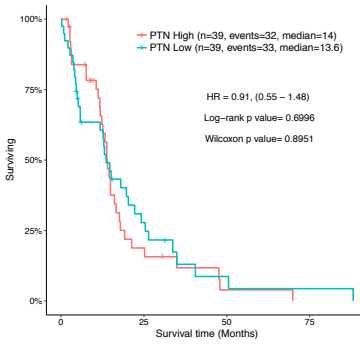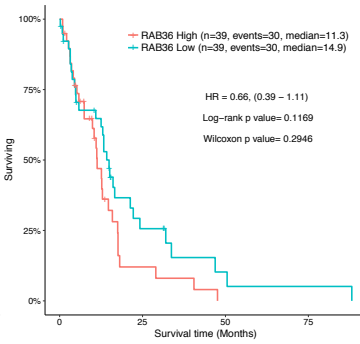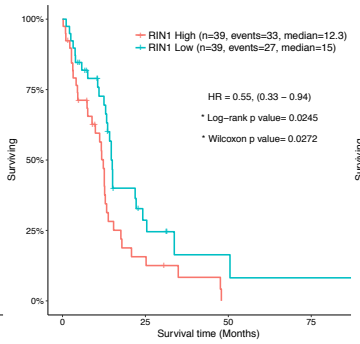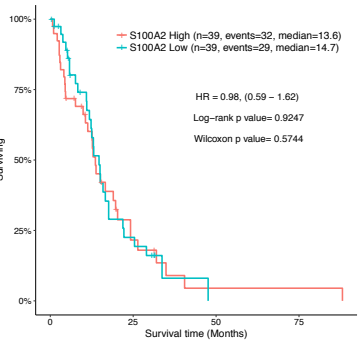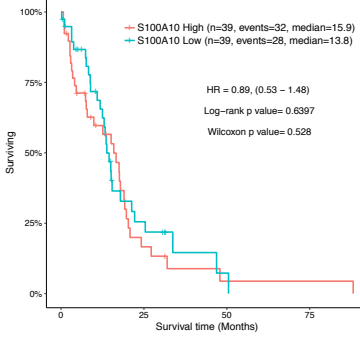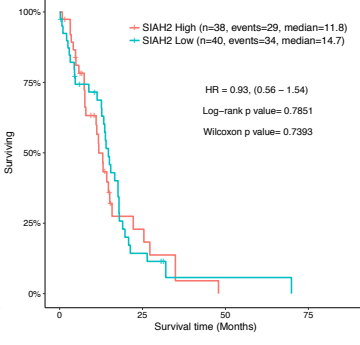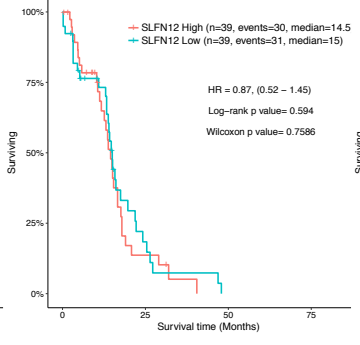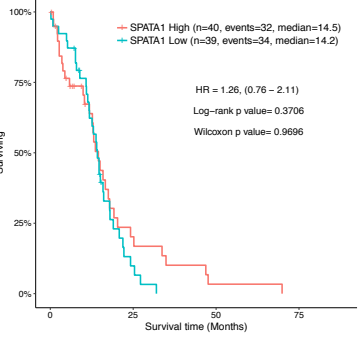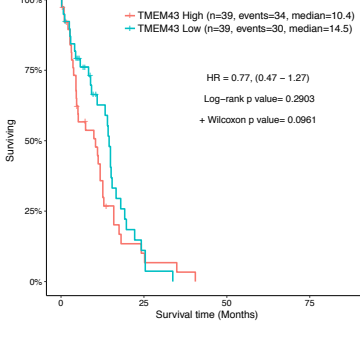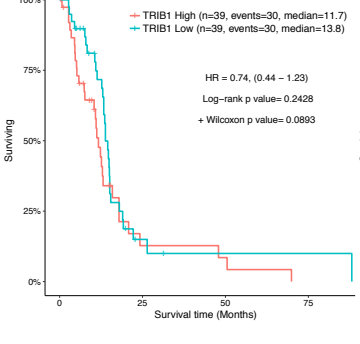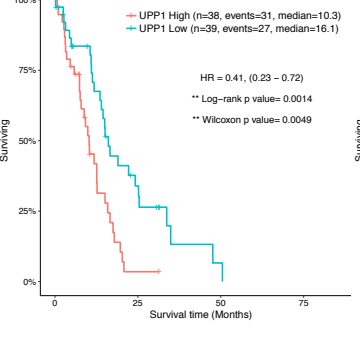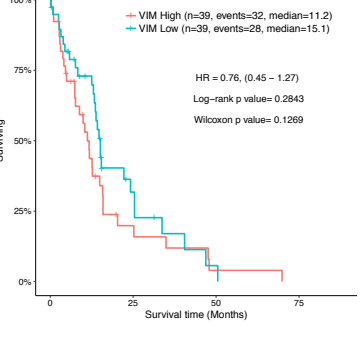

**Figure S3.** Glioblastomas (GBM-TCGA) median overall survival (OS) estimation based on gene expression for c-Jun target genes using the Kaplan-Meier method (cut-off defined by splitting datasets in 25% lower expressing vs 25% higher expressing patients). Vertical marks indicate censorship, the number of patients and median survival in months per group are shown, and the hazard ratio (HR) is defined. The log-rank test and Wilcoxon p-values are displayed (\*p-value < 0.05, \*\*p-value < 0.01 and \*\*\*p-value < 0.001).

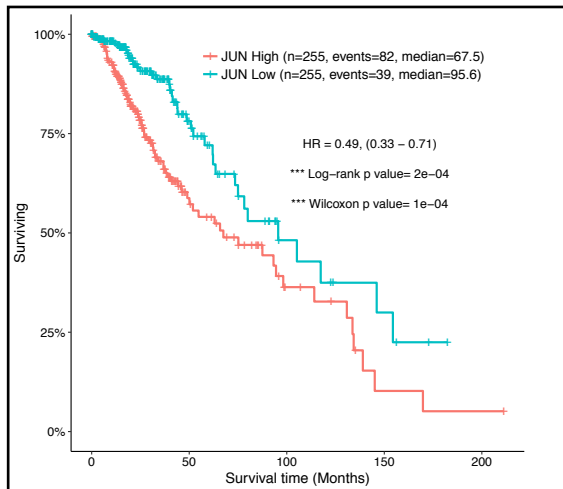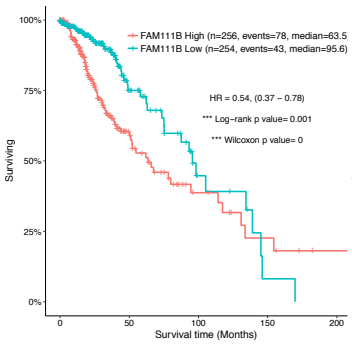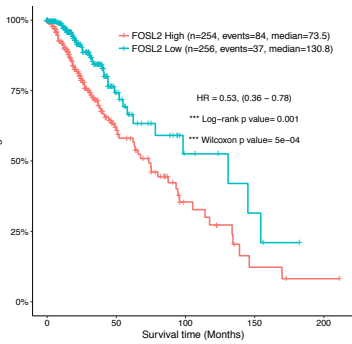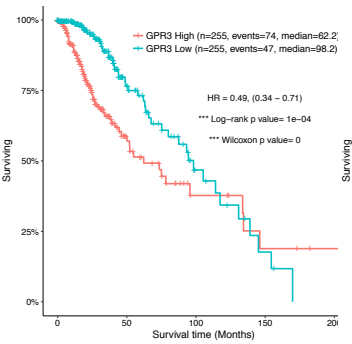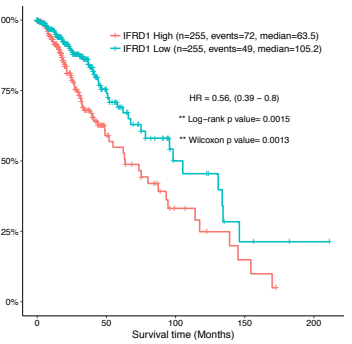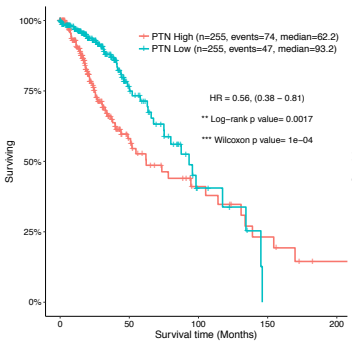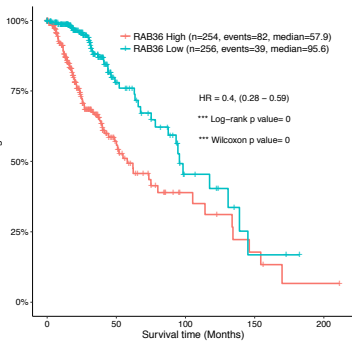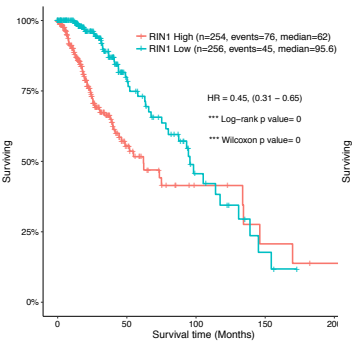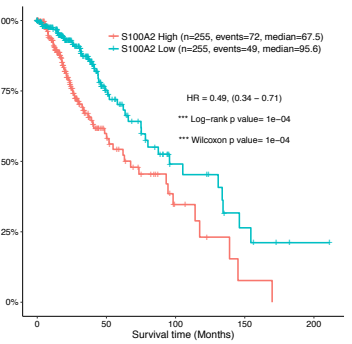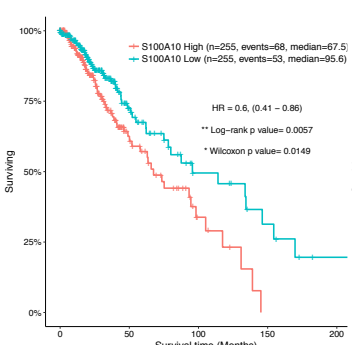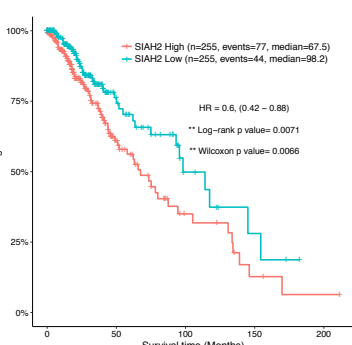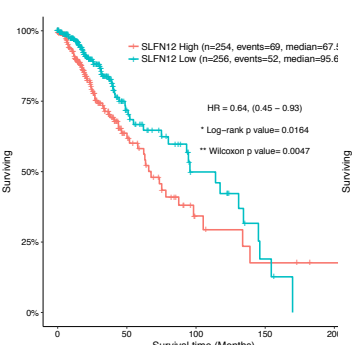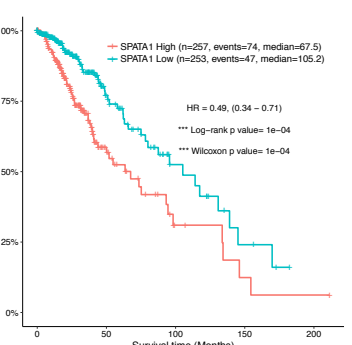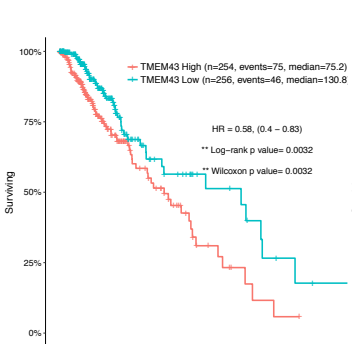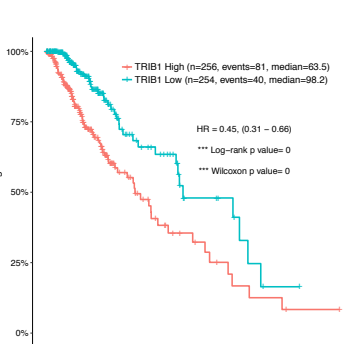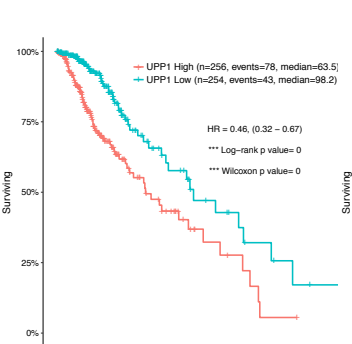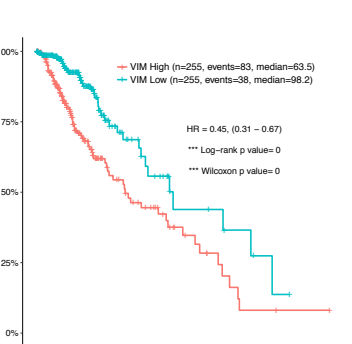

**Figure S4.** Low-Grade Gliomas (LGG-TCGA) median overall survival (OS) estimation based on gene expression for c-Jun target genes using the Kaplan-Meier method (cut-off defined by splitting datasets in 25% lower expressing vs 25% higher expressing patients). Vertical marks indicate censorship, the number of patients and median survival in months per group are shown, and the hazard ratio (HR) is defined. The log-rank test and Wilcoxon p-values are displayed (\*p-value < 0.05, \*\*p-value < 0.01 and \*\*\*p-value < 0.001).

**A**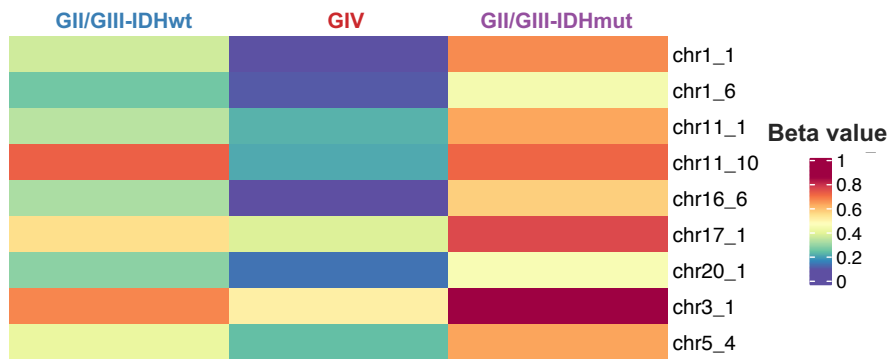**B**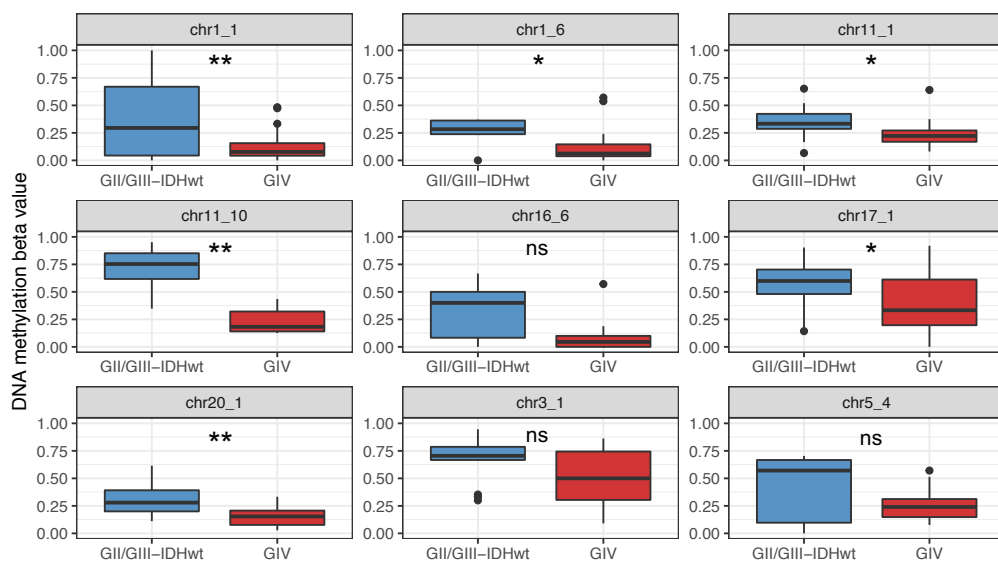**C**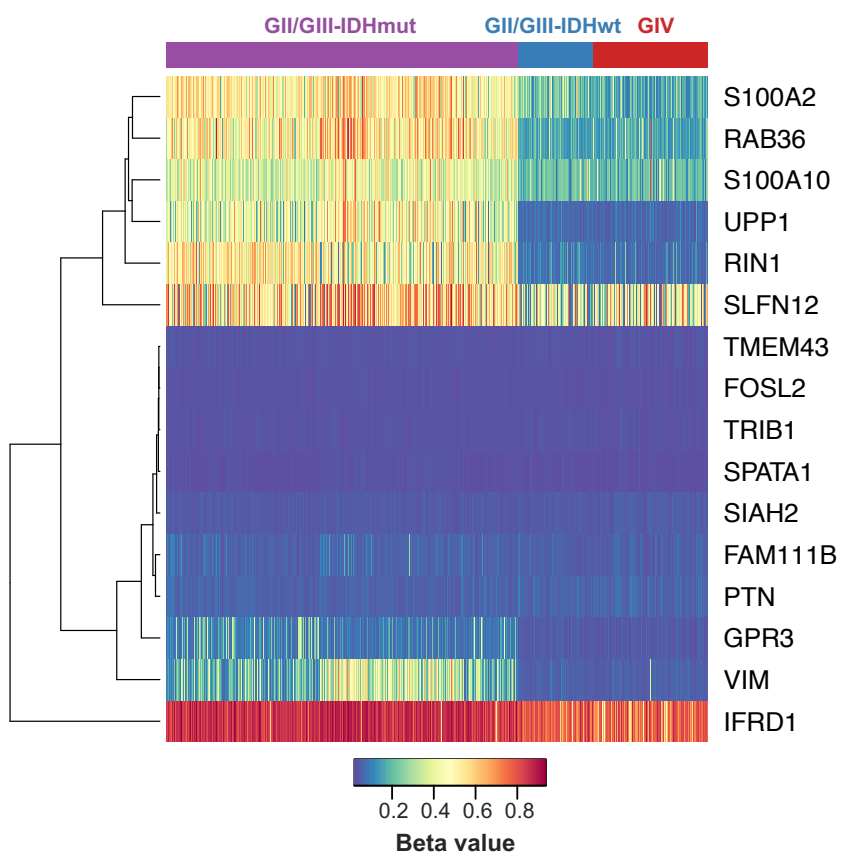**D**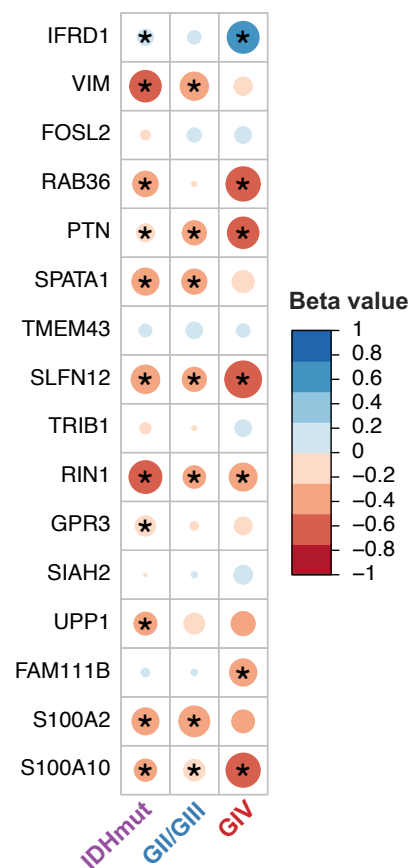

**Figure S5.** DNA methylation pattern of c-Jun regulated genes in human gliomas. **(A)** Heatmap represents regional DNA methylation differences (C-rich regions overlapping c-Jun motifs) from putative glioma enhancers. **(B)** Boxplots depict C-rich regions overlapping c-Jun motifs having significantly different DNA methylation pattern among glioma groups (\*FDR < 0.05, \*\*FDR < 0.01 and \*\*\*FDR < 0.001). **(C)** DNA methylation pattern in the promoters (median beta value from the +2 kb/-500 bp relative to TSS) of joined LGG and GBM TCGA datasets (GII, III and IV of WHO 2016 classification). **(D)** Correlation plot of DNA methylation from the promoters (as in panel C) correlated with gene expression. Significant (FDR<0.05) correlations were marked with an asterisk.

**A**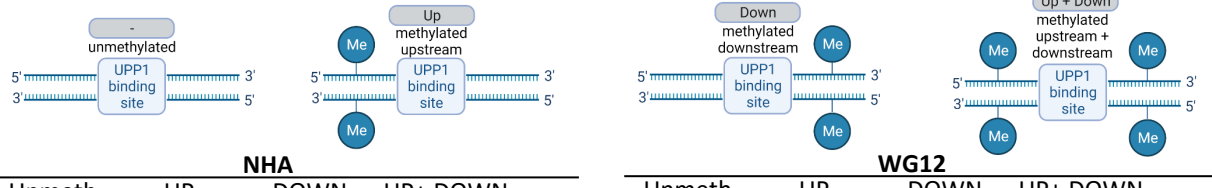**NHA**

Unmeth. UP DOWN UP+ DOWN

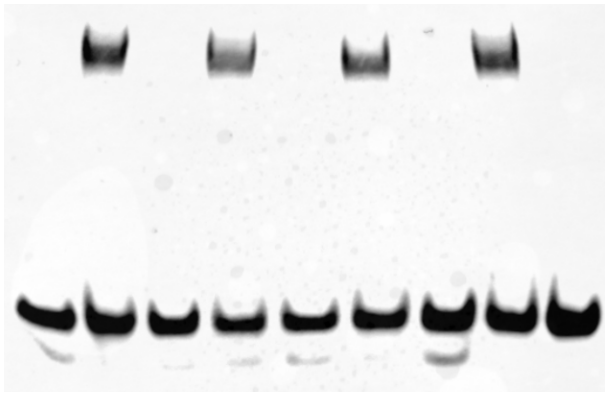**WG12**

Unmeth. UP DOWN UP+ DOWN

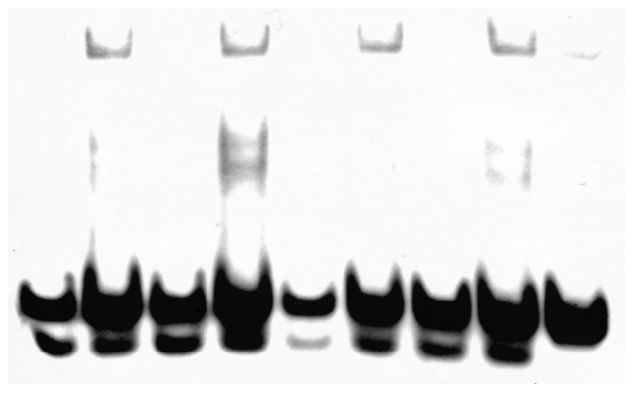

|                 |   |   |   |   |   |   |   |   |   |
|-----------------|---|---|---|---|---|---|---|---|---|
| Nuclear extract | - | + | - | + | - | + | - | + | + |
| Probe           | + | + | + | + | + | + | + | + | + |
| Competitor      | - | - | - | - | - | - | - | - | + |

|                 |   |   |   |   |   |   |   |   |   |
|-----------------|---|---|---|---|---|---|---|---|---|
| Nuclear extract | - | + | - | + | - | + | - | + | + |
| Probe           | + | + | + | + | + | + | + | + | + |
| Competitor      | - | - | - | - | - | - | - | - | + |

**LN18**

Unmeth. UP DOWN UP+ DOWN

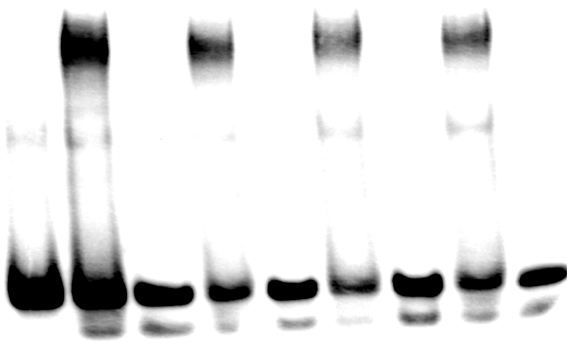**LN229**

Unmeth. UP DOWN UP+ DOWN

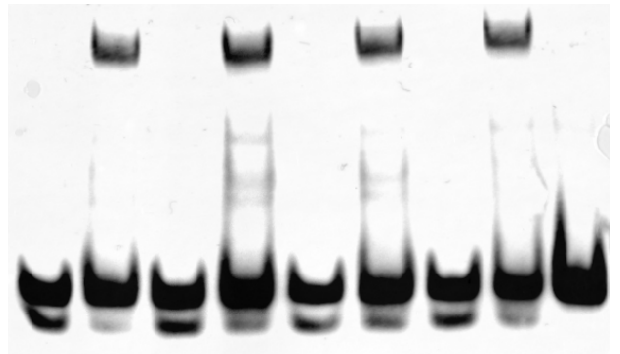

|                 |   |   |   |   |   |   |   |   |   |
|-----------------|---|---|---|---|---|---|---|---|---|
| Nuclear extract | - | + | - | + | - | + | - | + | + |
| Probe           | + | + | + | + | + | + | + | + | + |
| Competitor      | - | - | - | - | - | - | - | - | + |

|                 |   |   |   |   |   |   |   |   |   |
|-----------------|---|---|---|---|---|---|---|---|---|
| Nuclear extract | - | + | - | + | - | + | - | + | + |
| Probe           | + | + | + | + | + | + | + | + | + |
| Competitor      | - | - | - | - | - | - | - | - | + |

**B**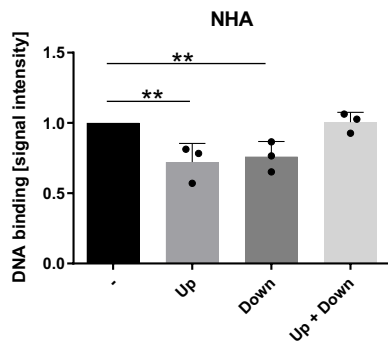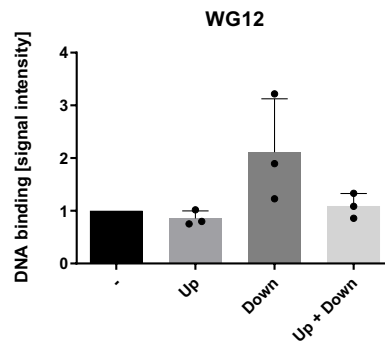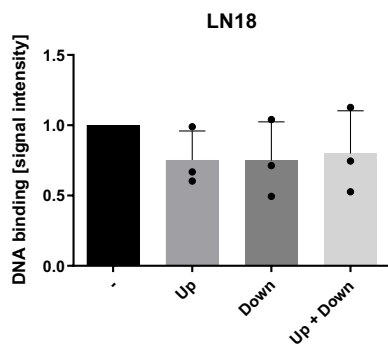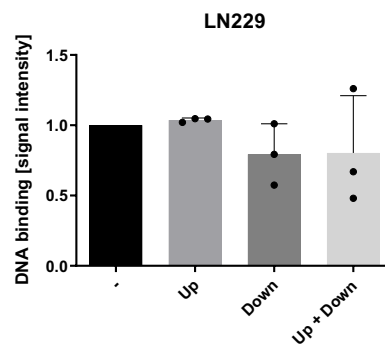

**Figure S6.** EMSA for nuclear extracts employing probes with different methylation patterns. **(A)** Each EMSA compares binding of nuclear protein extract to DNA of probes containing the genomic sequence matching c-Jun motif (ACTCAGTGAA) within the *UPP1* promoter in different cell lines. Nuclear protein and DNA complex formation was compared for 4 different primers: unmethylated, upstream methylated, downstream methylated and up- and down-stream methylated. **(B)** Data were normalized to unmethylated oligonucleotides and p-values were calculated using the one-way ANOVA with Dunnett's post-hoc test, \*\*p < 0.01,  $\pm$ SD.



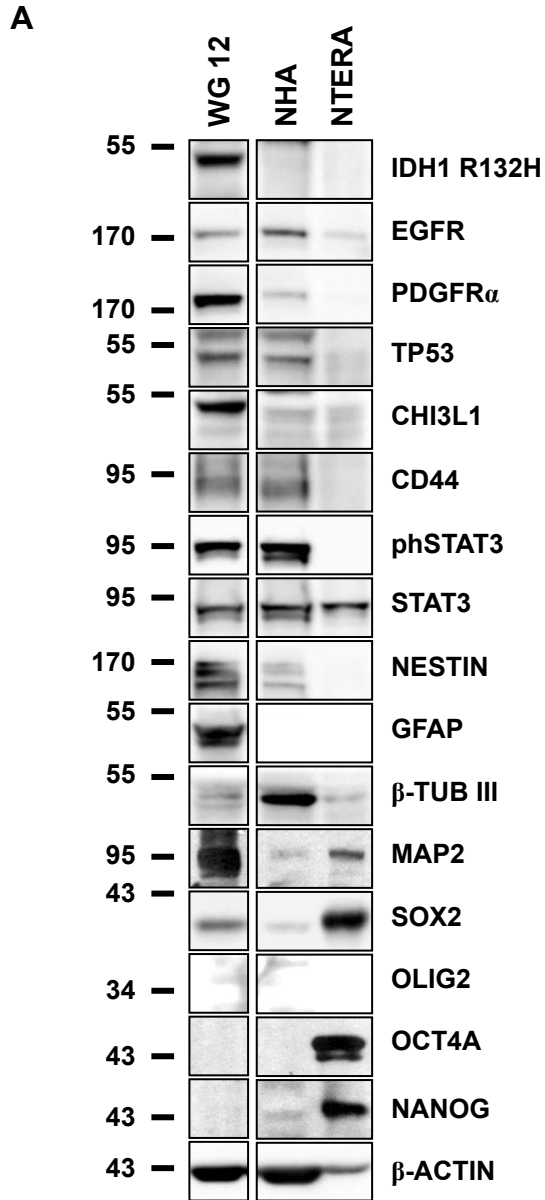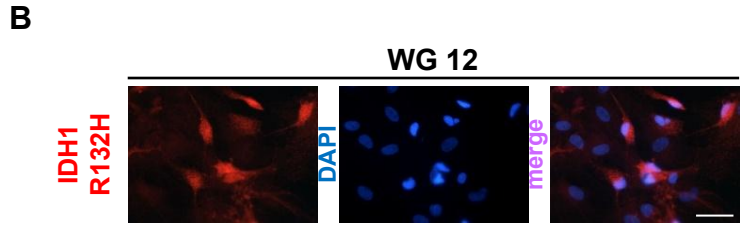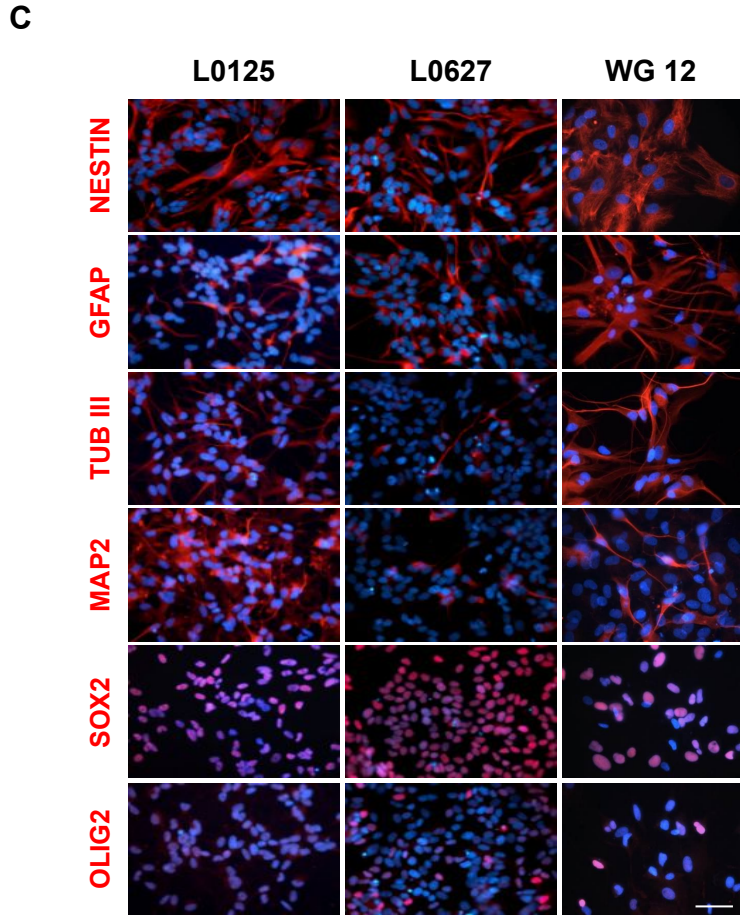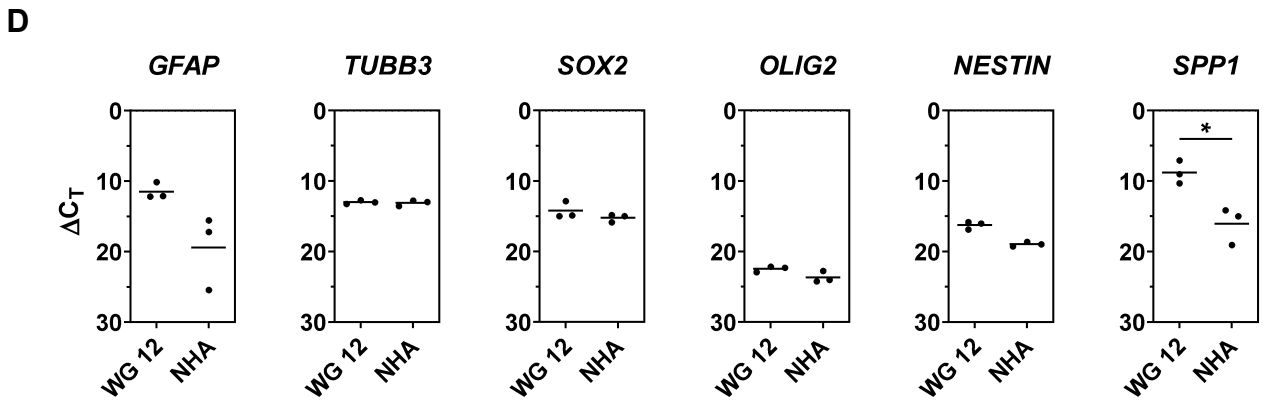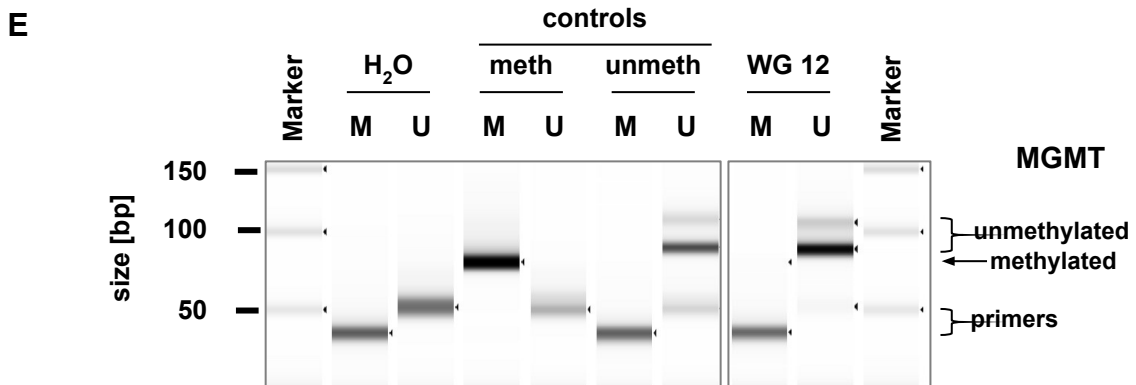

**Figure S7.** Characterization of patient-derived primary WG12 cell line. **(A)** Western Blot analysis of pluripotency (OCT4A, NANOG), neural stem/progenitor (NESTIN, SOX2, OLIG2), astrocytic (GFAP) and neuronal (MAP2,  $\beta$ -Tubulin III) markers in WG12 cells. Other proteins represent the markers of glioblastoma subtypes: CHI3L1, pSTAT3, CD44 (mesenchymal); EGFR (classical); PDGFR $\alpha$ , TP53, IDH1 R132H, (proneural) according to Verhaak classification. NHA cells serve as a non-malignant control, whereas NTERA cells as control with stemness phenotype.  $\beta$ -actin and STAT3 were used as a loading control. **(B)** Immunofluorescent staining of IDH1 R132H mutation in WG12 cells. **(C)** Immunostaining of neural stem/progenitor (NESTIN, OLIG2, SOX2) and differentiation (GFAP, MAP2,  $\beta$ -Tubulin III) markers in WG12 cells. Serum-differentiated L0125 and L0627 cells serve as a control for stemness and differentiation properties. **(D)** Expression of neural stem/progenitor (*SOX2*, *OLIG2*, *NESTIN*, *SPP1*) and differentiation (*GFAP*, *TUBB3*) markers in WG12 and in control NHA cells. **(E)** *MGMT* promoter methylation status analysis in glioma primary WG12 cells.
